# Supplementary material
Source: publisher figshare collection journal article supplement (https://sage.figshare.com/ndownloader/files/22660334)
Supplement: Supplementary file 1 [file 22660334]

To publish online only

## The performance of researchers in multidisciplinary research groups: Does social capital matter?

Marta Ruiz Martinez et al.

### Tables

**Table 1. Exploratory Factor Analysis Results**

| Items                                                                                                                  | Component<br>(factor loadings) |        |       |
|------------------------------------------------------------------------------------------------------------------------|--------------------------------|--------|-------|
|                                                                                                                        | 1                              | 2      | 3     |
| In my research team, the research members usually ...                                                                  |                                |        |       |
| ... maintain contacts and collaborations with colleagues within the same field of research                             | 0.825                          |        |       |
| ... obtain joint research results with colleagues within the same field of research (e.g. research projects or theses) | 0.812                          |        |       |
| ... maintain a good social climate                                                                                     | 0.784                          |        |       |
| ... attend seminars, conferences or workshops in our field                                                             | 0.701                          |        |       |
| ... exchange ideas and share knowledge and information                                                                 | 0.660                          |        |       |
| ... interact frequently and easily with one another                                                                    | 0.640                          |        |       |
| ... obtain joint research results with colleagues from other fields of research (e.g. research projects or theses)     |                                | 0.892  |       |
| ... maintain contacts and collaborations with colleagues from other fields of research                                 |                                | 0.859  |       |
| ... partner with management professionals to develop research processes                                                |                                | 0.629  |       |
| ... hold regular formal meetings                                                                                       |                                |        | 0.822 |
| ... hold frequent informal meetings                                                                                    |                                |        | 0.659 |
| Eigenvalues                                                                                                            | 4.931                          | 1.780  | 0.944 |
| Total variance explained by each factor (%)                                                                            | 44.825                         | 16.183 | 8.580 |
| Cumulative variance explained by the factors (%)                                                                       | 44.825                         | 61.009 | 69.59 |
| Cronbach's alpha                                                                                                       | 0.883                          | 0.777  | 0.635 |
| Kaiser–Meyer–Olkin: 0.829                                                                                              |                                |        |       |
| Bartlett's test of sphericity: Chi-square: 590.104                                                                     |                                |        |       |
| gl : 55                                                                                                                |                                |        |       |
| Signification: 0.000                                                                                                   |                                |        |       |

\*\*\*significant at 1%; Varimax rotation was used to simplify the interpretation of the factors

**Table 2. Descriptive statistics and correlations**

| Variable | Max | Min | Mean | SD | 1 | 2 | 3 | 4 | 5 | 6 | 7 |
|----------|-----|-----|------|----|---|---|---|---|---|---|---|
|----------|-----|-----|------|----|---|---|---|---|---|---|---|

|   |                                    |      |   |        |       |         |         |        |          |   |   |   |  |  |  |  |  |  |  |
|---|------------------------------------|------|---|--------|-------|---------|---------|--------|----------|---|---|---|--|--|--|--|--|--|--|
| 1 | H-Index                            | 23   | 0 | 4.173  | 5.106 | 1       |         |        |          |   |   |   |  |  |  |  |  |  |  |
| 2 | Team size                          | 60   | 2 | 8.130  | 8.996 | 0.048   | 1       |        |          |   |   |   |  |  |  |  |  |  |  |
| 3 | Experience                         | 50   | 2 | 14.730 | 9.677 | 0.569** | 0.045   | 1      |          |   |   |   |  |  |  |  |  |  |  |
| 4 | Multidisciplinarity                | 0.95 | 0 | 0.513  | 0.362 | 0.052   | 0.106   | 0.068  | 1        |   |   |   |  |  |  |  |  |  |  |
| 5 | Internal social capital (factor)   |      |   | 0      | 1     | 0.070   | -0.215* | 0.055  | -0.281** | 1 |   |   |  |  |  |  |  |  |  |
| 6 | External social capital (factor)   |      |   | 0      | 1     | -0.170  | 0.037   | -0.022 | -0.305** | 0 | 1 |   |  |  |  |  |  |  |  |
| 7 | Structural social capital (factor) |      |   | 0      | 1     | -0.027  | -0.138  | -0.009 | -0.460** | 0 | 0 | 1 |  |  |  |  |  |  |  |

\*\* Correlation is significant at the 0.01 level; \* Correlation is significant at the 0.05 level

**Table 3. Results of the regression analysis**

| Variables                           | Model 1          | Model 2          | Model 3          | Model 4          |
|-------------------------------------|------------------|------------------|------------------|------------------|
| Constant                            | (0.835)          | (0.979)          | (1.077)          | (1.071)          |
| Experience                          | 0.567*** (0.042) | 0.566*** (0.043) | 0.515*** (0.044) | 0.465** (0.045)  |
| Team Size                           | 0.020 (0.049)    | 0.019 (0.05)     | -0.006 (0.049)   | 0.027 (0.05)     |
| Multidisciplinarity                 |                  | 0.012 (1.138)    | 1.202** (7.448)  | 1.419*** (7.538) |
| Multidisciplinarity <sup>2</sup>    |                  |                  | -1.199** (7.774) | -1.366** (7.825) |
| Multidisciplinarity × Internal SC   |                  |                  |                  | 0.170* (0.687)   |
| Multidisciplinarity × External SC   |                  |                  |                  | -0.016 (0.628)   |
| Multidisciplinarity × Structural SC |                  |                  |                  | 0.098 (0.696)    |
| R <sup>2</sup>                      | 0.322            | 0.323            | 0.355            | 0.382            |
| Durbin–Watson                       |                  |                  |                  | 1.472            |
| Overall F                           | 25.457***        | 16.823***        | 14.427***        | 8.998***         |

N = 110. Standardized regression coefficients are report, standard errors are in parentheses. \* $p < 0.1$ , \*\*  $p < 0.05$ , \*\*\*  $p < 0.01$

## FIGURES

**Figure 2. Interactions between SC dimensions**

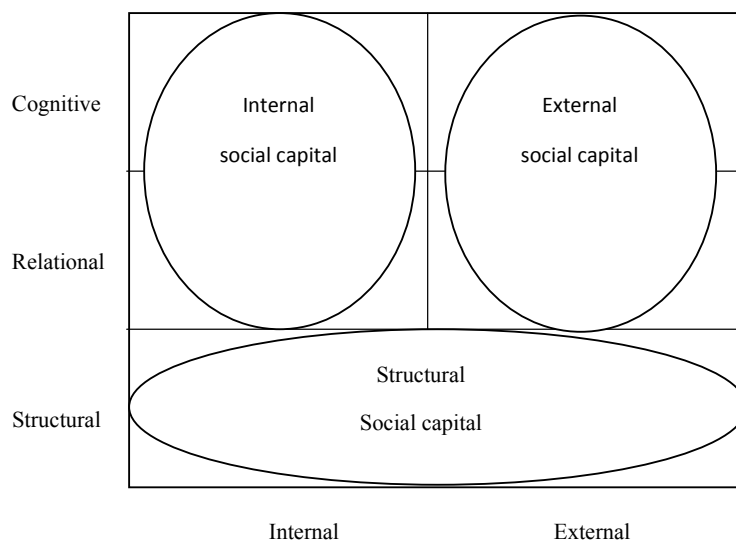

Source: Own elaboration

## Appendix 1: Questionnaire of social capital

We request that you give us your opinion on a series of questions related to your activity as a researcher belonged to a research team.  
It will take no more than 5 minutes. All the data you provide us will be treated in an aggregated and anonymous way, with strictly academic objectives, so your answers will be completely confidential.

| Researcher information                                                                                                |                          |                          |                          |                          |                          |
|-----------------------------------------------------------------------------------------------------------------------|--------------------------|--------------------------|--------------------------|--------------------------|--------------------------|
| Name:                                                                                                                 |                          |                          |                          |                          |                          |
| University:                                                                                                           |                          |                          |                          |                          |                          |
| Gender:                                                                                                               |                          | Position:                |                          | Scientific field:        |                          |
| Years of research experience:                                                                                         |                          |                          |                          |                          |                          |
| Please indicate your degree of agreement with the following statements:                                               |                          |                          |                          |                          |                          |
|                                                                                                                       | <i>Strongly disagree</i> |                          |                          |                          | <i>Strongly agree</i>    |
| In my research team, the research members usually ...                                                                 | 1                        | 2                        | 3                        | 4                        | 5                        |
| ...maintain contacts and collaborations with colleagues within the same field of research                             | <input type="checkbox"/> |
| ...interact frequently and easily with one another                                                                    | <input type="checkbox"/> |
| ...maintain contacts and collaborations with colleagues from other fields of research                                 | <input type="checkbox"/> |
| ...attend seminars, conferences or workshops in our field                                                             | <input type="checkbox"/> |
| ...exchange ideas and share knowledge and information                                                                 | <input type="checkbox"/> |
| ...obtain joint research results with colleagues within the same field of research (e.g. research projects or theses) | <input type="checkbox"/> |
|                                                                                                                       | <input type="checkbox"/> |
|                                                                                                                       | <input type="checkbox"/> |

...obtain joint research results with colleagues from other fields of research (e.g. research projects or theses)

...maintain a good social climate

...hold frequent informal meetings

...hold regular formal meetings

...partner with management professionals to develop research processes
